# Supplementary material for: Combining a Simple Method for DNA/RNA/Protein Co-Purification and Arabidopsis Protoplast Assay to Facilitate Viroid Research
Source: MDPI journal article supplement (doi:10.3390/v11040324), 2019-04-03
Supplement: s1 [file s1]

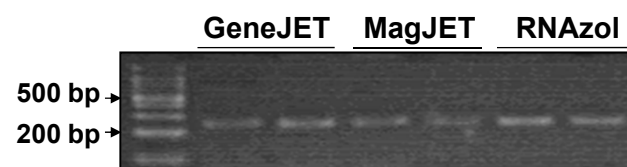

**Figure S1. RT-PCR assessing RNA quality.**  
RT-PCR of a *GFP* fragment confirms the successful purification of RNA.

**Figure S1**

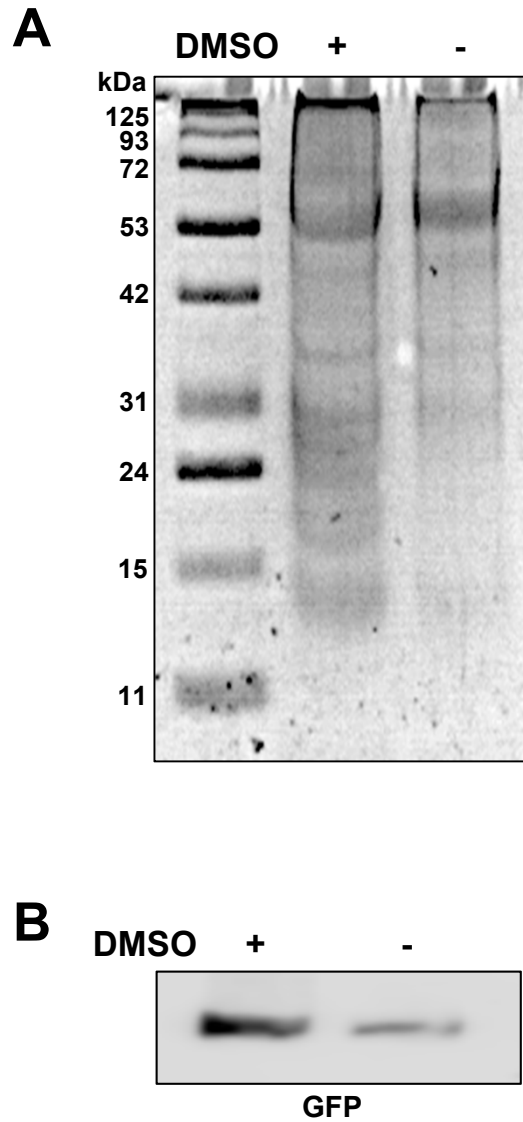

**Figure S2. Assessing the effect of DMSO.** Two equal volumes of RNA-depleted supernatant from MagJET RNA purification were treated with or without DMSO. Silver staining of SDS-PAGE gel (A) and immunoblotting (B) demonstrated that the supplementation of DMSO slightly enhanced the protein recovery rate, but may be omitted to simplify the protocol for high-throughput assays.

**Figure S2**
